# Supplementary material for: Prediction of Tumor Cellularity in Resectable PDAC from Preoperative Computed Tomography Imaging
Source: MDPI journal article supplement (doi:10.3390/cancers13092069), 2021-04-25
Supplement: s1 [file s1]

# Prediction of Tumor Cellularity in Resectable PDAC from Pre-operative Computed Tomography Imaging

Friederike Jungmann, Georgios A. Kaissis, Sebastian Ziegelmayer, Felix Harder, Clara Schilling, Hsi-Yu Yen, Katja Steiger, Wilko Weichert, Rebekka Schirren, Ishan Ekin Demir, Helmut Friess, Markus R. Makowski, Rickmer F. Braren and Fabian K. Lohöfer

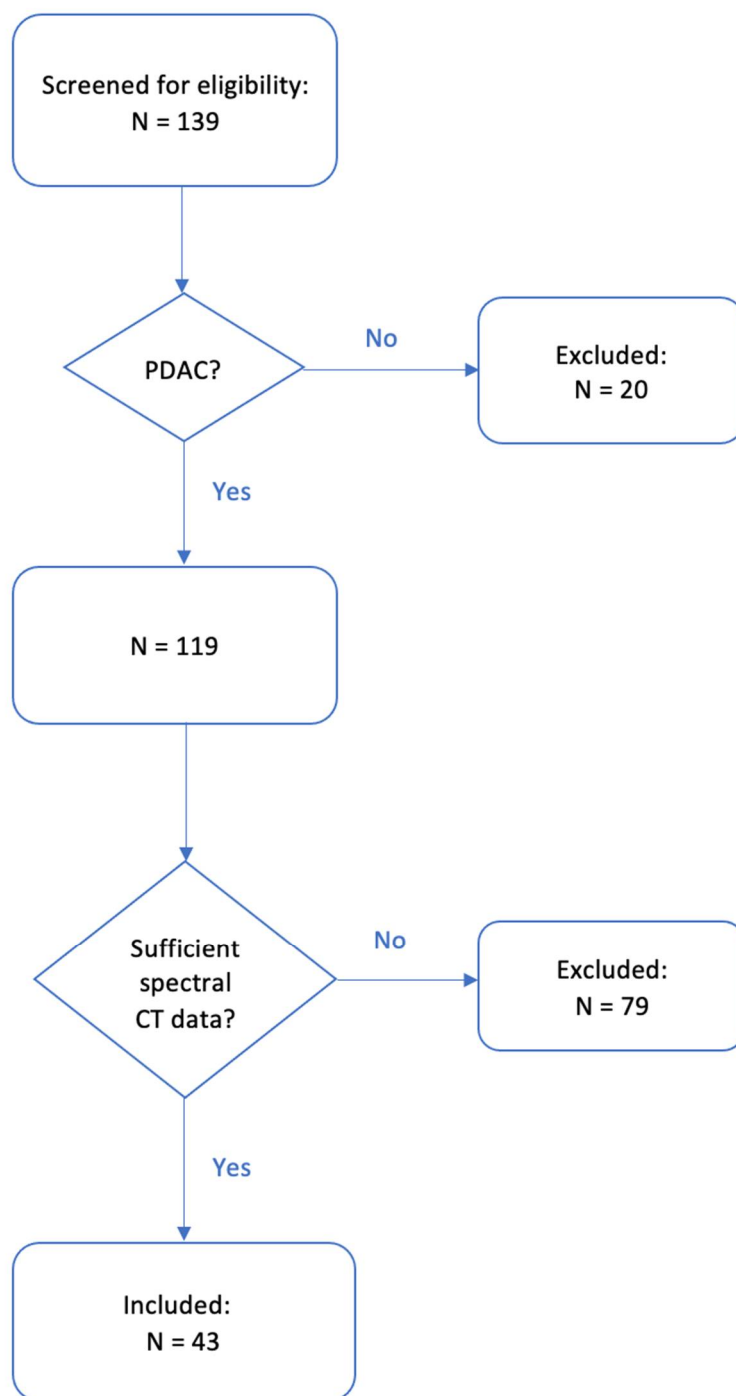

**Figure S1.** Patient Inclusion Flowchart.

**Table S1.** STROBE Checklist.

|                           | Item No | Recommendation                                                                                                                                                                       | Remark/ Location            |
|---------------------------|---------|--------------------------------------------------------------------------------------------------------------------------------------------------------------------------------------|-----------------------------|
| Title and abstract        | 1       | (a) Indicate the study's design with a commonly used term in the title or the abstract                                                                                               | Abstract                    |
|                           |         | (b) Provide in the abstract an informative and balanced summary of what was done and what was found                                                                                  | Abstract (Methods, Results) |
| Introduction              |         |                                                                                                                                                                                      |                             |
| Background/rationale      | 2       | Explain the scientific background and rationale for the investigation being reported                                                                                                 | Abstract, Introduction      |
| Objectives                | 3       | State specific objectives, including any prespecified hypotheses                                                                                                                     | Introduction, Discussion    |
| Methods                   |         |                                                                                                                                                                                      |                             |
| Study design              | 4       | Present key elements of study design early in the paper                                                                                                                              | Methods                     |
| Setting                   | 5       | Describe the setting, locations, and relevant dates, including periods of recruitment, exposure, follow-up, and data collection                                                      | Methods                     |
| Participants              | 6       | (a) Give the eligibility criteria, and the sources and methods of selection of participants. Describe methods of follow-up                                                           | Methods                     |
|                           |         | (b) For matched studies, give matching criteria and number of exposed and unexposed                                                                                                  | Not applicable              |
| Variables                 | 7       | Clearly define all outcomes, exposures, predictors, potential confounders, and effect modifiers. Give diagnostic criteria, if applicable                                             | Methods, Results            |
| Data sources/ measurement | 8 *     | For each variable of interest, give sources of data and details of methods of assessment (measurement). Describe comparability of assessment methods if there is more than one group | Methods                     |
| Bias                      | 9       | Describe any efforts to address potential sources of bias                                                                                                                            | Methods, Results            |

|                        |      |                                                                                                                                                                                                                                                           |                     |
|------------------------|------|-----------------------------------------------------------------------------------------------------------------------------------------------------------------------------------------------------------------------------------------------------------|---------------------|
| Study size             | 10   | Explain how the study size was arrived at                                                                                                                                                                                                                 | Methods, Supplement |
| Quantitative variables | 11   | Explain how quantitative variables were handled in the analyses. If applicable, describe which groupings were chosen and why<br>(a) Describe all statistical methods, including those used to control for confounding                                     | Methods             |
| Statistical methods    | 12   | (b) Describe any methods used to examine subgroups and interactions                                                                                                                                                                                       | Methods             |
|                        |      | (c) Explain how missing data were addressed                                                                                                                                                                                                               | Not applicable      |
|                        |      | (d) If applicable, explain how loss to follow-up was addressed                                                                                                                                                                                            | Not applicable      |
|                        |      | (e) Describe any sensitivity analyses                                                                                                                                                                                                                     | Not applicable      |
| <b>Results</b>         |      |                                                                                                                                                                                                                                                           |                     |
| Participants           | 13 * | (a) Report numbers of individuals at each stage of study—eg numbers potentially eligible, examined for eligibility, confirmed eligible, included in the study, completing follow-up, and analysed<br>(b) Give reasons for non-participation at each stage | Methods, Supplement |
|                        |      | (c) Consider use of a flow diagram                                                                                                                                                                                                                        | Supplement          |
| Descriptive data       | 14 * | (a) Give characteristics of study participants (eg demographic, clinical, social) and information on exposures and potential confounders<br>(b) Indicate number of participants with missing data for each variable of interest                           | Results, Table 1    |
|                        |      | (c) Summarise follow-up time (eg, average and total amount)                                                                                                                                                                                               | Results, Table 1    |
| Outcome data           | 15 * | Report numbers of outcome events or summary measures over time                                                                                                                                                                                            | Results             |
| Main results           | 16   | (a) Give unadjusted estimates and, if applicable,                                                                                                                                                                                                         | Results             |

|                          |    |                                                                                                                                                                                                                                                                                                                                                                            |                                             |
|--------------------------|----|----------------------------------------------------------------------------------------------------------------------------------------------------------------------------------------------------------------------------------------------------------------------------------------------------------------------------------------------------------------------------|---------------------------------------------|
|                          |    | <p>confounder-adjusted estimates and their precision (eg, 95% confidence interval). Make clear which confounders were adjusted for and why they were included</p> <p>(b) Report category boundaries when continuous variables were categorized</p> <p>(c) If relevant, consider translating estimates of relative risk into absolute risk for a meaningful time period</p> | <p>Not applicable</p> <p>Not applicable</p> |
| Other analyses           | 17 | Report other analyses done—eg analyses of subgroups and interactions, and sensitivity analyses                                                                                                                                                                                                                                                                             | Results                                     |
| <b>Discussion</b>        |    |                                                                                                                                                                                                                                                                                                                                                                            |                                             |
| Key results              | 18 | Summarise key results with reference to study objectives                                                                                                                                                                                                                                                                                                                   | Discussion                                  |
| Limitations              | 19 | Discuss limitations of the study, taking into account sources of potential bias or imprecision. Discuss both direction and magnitude of any potential bias                                                                                                                                                                                                                 | Discussion                                  |
| Interpretation           | 20 | Give a cautious overall interpretation of results considering objectives, limitations, multiplicity of analyses, results from similar studies, and other relevant evidence                                                                                                                                                                                                 | Discussion                                  |
| Generalisability         | 21 | Discuss the generalisability (external validity) of the study results                                                                                                                                                                                                                                                                                                      | Discussion                                  |
| <b>Other information</b> |    |                                                                                                                                                                                                                                                                                                                                                                            |                                             |
| Funding                  | 22 | Give the source of funding and the role of the funders for the present study and, if applicable, for the original study on which the present article is based                                                                                                                                                                                                              | Preamble                                    |
